# Supplementary material
Source: PubMed Central journal article supplement (PMC6951841)
Supplement: mmc1.pdf [file mmc1.pdf]

YMTHE, Volume 28

## **Supplemental Information**

### **Timeless-Stimulated miR-5188-FOXO1/ $\beta$ -Catenin- c-Jun Feedback Loop Promotes Stemness via Ubiquitination of $\beta$ -Catenin in Breast Cancer**

**Yujiao Zou, Xian Lin, Junguo Bu, Zelong Lin, Yanjuan Chen, Yunhui Qiu, Haiyue Mo, Yao Tang, Weiyi Fang, and Ziqing Wu**

## Supplemental Figures

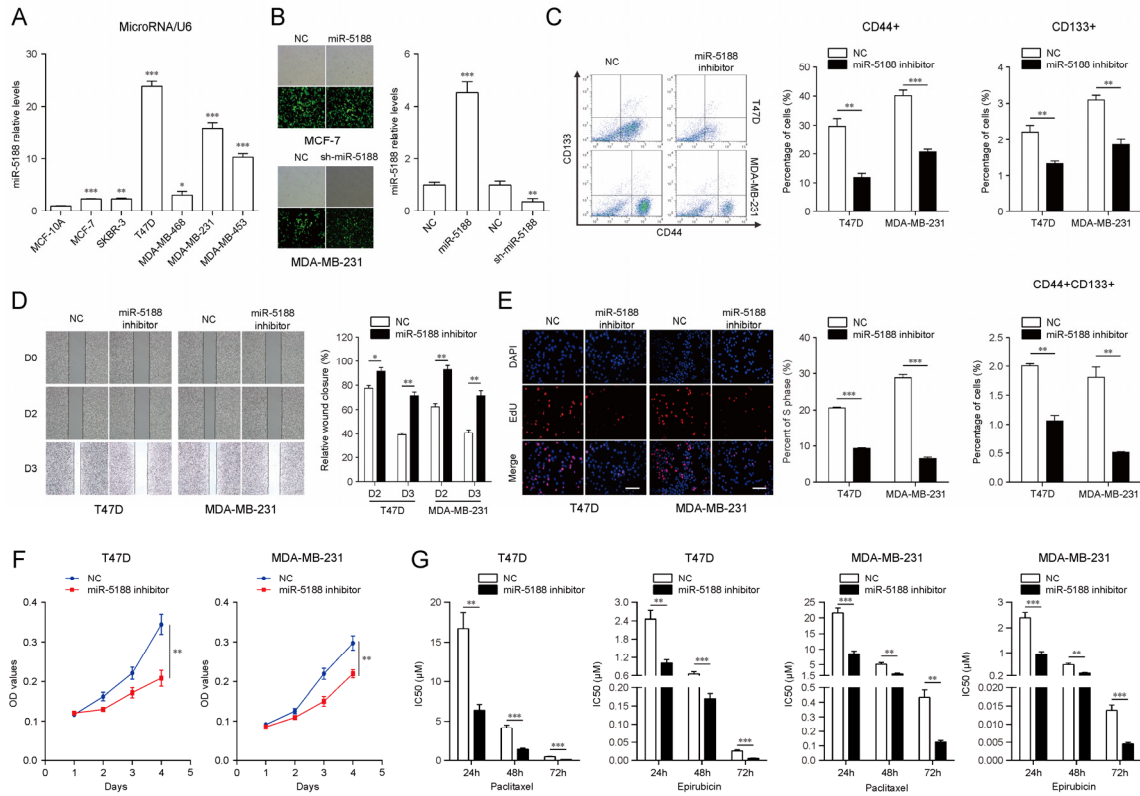

**Figure S1. miR-5188 knockdown suppresses breast cancer stemness, metastasis, proliferation, and**

**chemoresistance.** (A) qRT-PCR analysis of miR-5188 expression in MCF-7, SKBR-3, T47D, MDA-MB-

468, MDA-MB-231, MDA-MB-453, and MCF-10A cells. (B) miR-5188 expression in breast cancer cells

treated with lentivirus particles carrying has-miR-5188 precursor (miR-5188), miR-5188 shRNA (sh-miR-

5188) or their control (NC). (C) Flow cytometry, (D) wound healing assays, (E) EdU incorporation assays

(Scale bar: 100  $\mu$ m), (F) MTT assays, and (G) drug sensitivity tests of miR-5188-silenced T47D and MDA-

MB-231 cells, and their control cells. \* $p < 0.05$ ; \*\* $p < 0.01$ ; \*\*\* $p < 0.001$ .

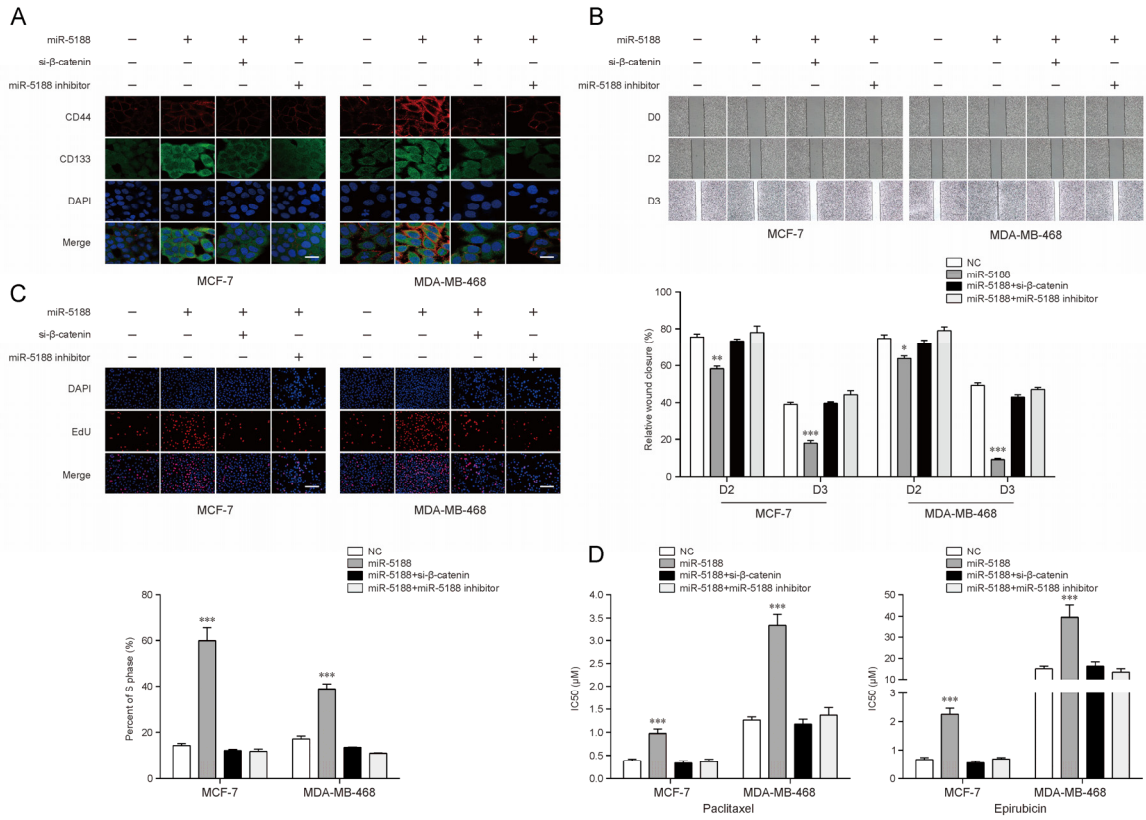

**Figure S2. miR-5188 accelerates  $\beta$ -catenin-mediated breast cancer stemness, metastasis, proliferation, and chemoresistance.** (A) Immunofluorescence analysis (Scale bar: 10  $\mu$ m), (B) wound healing assays, (C) EdU incorporation assays (Scale bar: 100  $\mu$ m), and (D) drug sensitivity tests of miR-5188-overexpressed breast cancer cells, miR-5188-overexpressed breast cancer cells with  $\beta$ -catenin knockdown, miR-5188-overexpressed breast cancer cells with miR-5188 knockdown, and their control cells. \*  $p < 0.05$ ; \*\*  $p < 0.01$ ; \*\*\*  $p < 0.001$ .

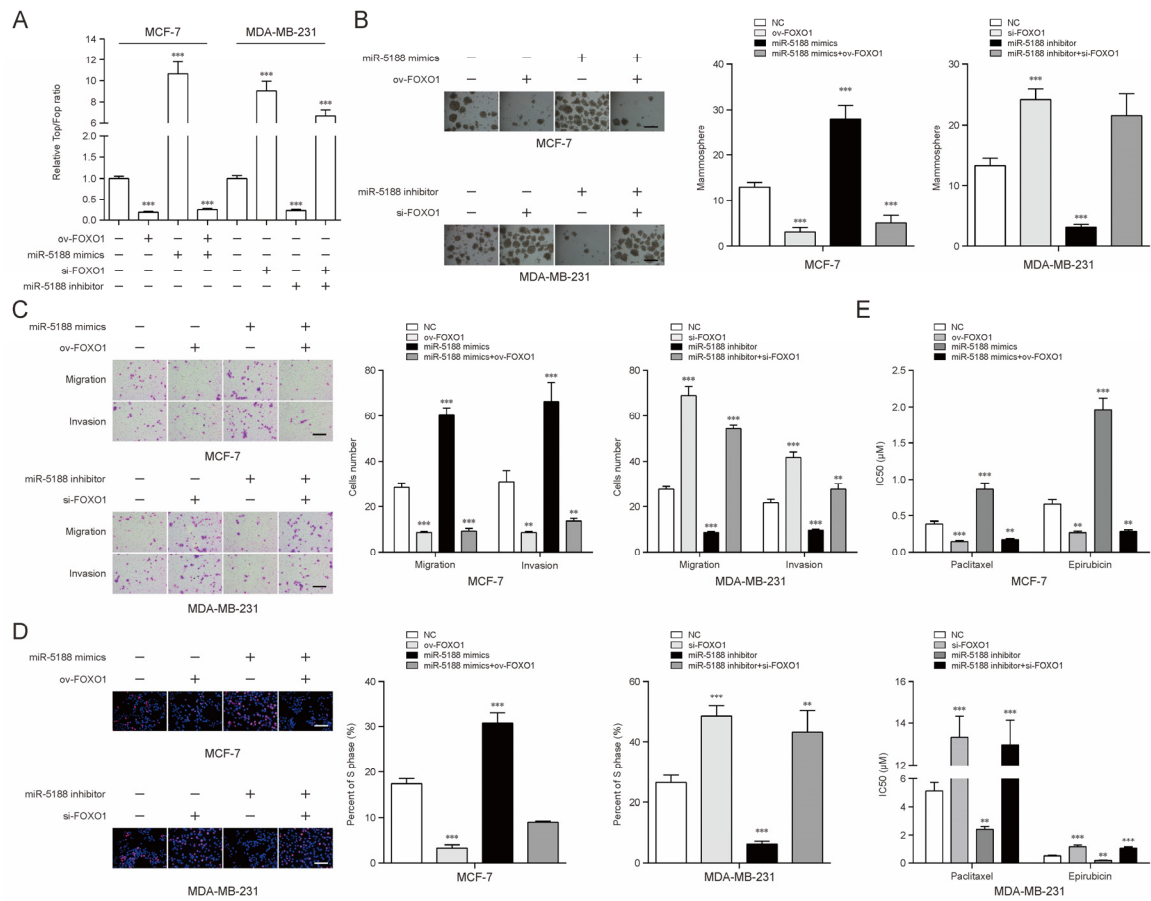

**Figure S3. miR-5188 regulates FOXO1-mediated breast cancer stemness, metastasis, proliferation, chemoresistance and Wnt/ $\beta$ -catenin/c-Jun signaling.** (A) TOP/FOP luciferase reporter assays of Wnt/ $\beta$ -catenin signaling activity in FOXO1-overexpressed MCF-7 cells, miR-5188-overexpressed MCF-7 cells, miR-5188-overexpressed MCF-7 cells with FOXO1 overexpression, FOXO1-silenced MDA-MB-231 cells, miR-5188-silenced MDA-MB-231 cells, miR-5188-silenced MDA-MB-231 cells with FOXO1 knockdown, and their control cells. (B) Mammosphere formation analysis (Scale bar: 40  $\mu$ m), (C) transwell assays (Scale bar: 40  $\mu$ m), (D) EdU incorporation assays (Scale bar: 100  $\mu$ m), and (E) drug sensitivity tests of FOXO1-overexpressed MCF-7 cells, miR-5188-overexpressed MCF-7 cells, miR-5188-overexpressed MCF-7 cells with FOXO1 overexpression, FOXO1-silenced MDA-MB-231 cells, miR-5188-silenced MDA-MB-231

cells, miR-5188-silenced MDA-MB-231 cells with FOXO1 knockdown, and their control cells. \*\* $p < 0.01$ ;

\*\*\* $p < 0.001$ .

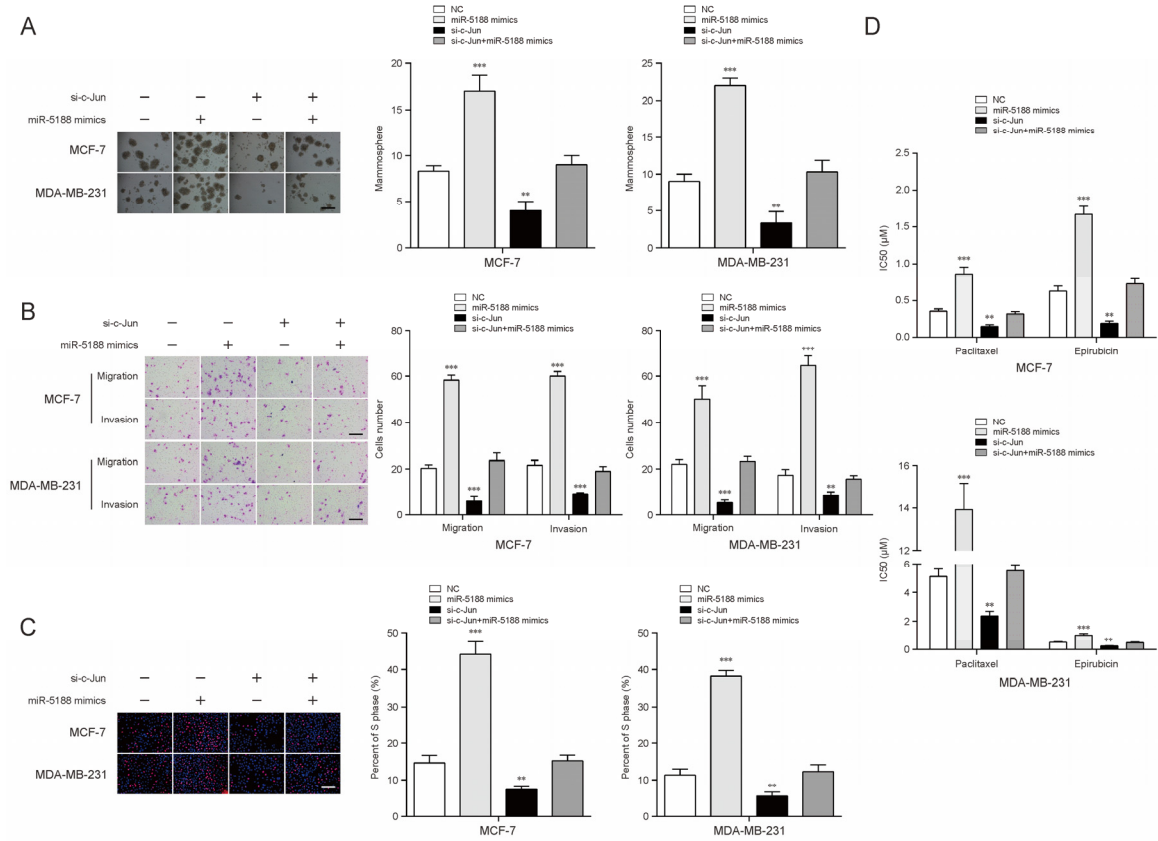

**Figure S4. c-Jun knockdown impaired miR-5188-mediated breast cancer stemness, metastasis, proliferation, and chemoresistance.** (A) Mammosphere formation assays (Scale bar: 40  $\mu\text{m}$ ), (B) transwell assays (Scale bar: 40  $\mu\text{m}$ ), (C) EdU incorporation assays (Scale bar: 100  $\mu\text{m}$ ) and (D) drug sensitivity tests of c-Jun-silenced MCF-7 and MDA-MB-231 cells, miR-5188-overexpressed MCF-7 and MDA-MB-231 cells, c-Jun-silenced MCF-7 and MDA-MB-231 cells with miR-5188 overexpression, and their control cells.

\*  $p < 0.05$ ; \*\*  $p < 0.01$ ; \*\*\*  $p < 0.001$ .

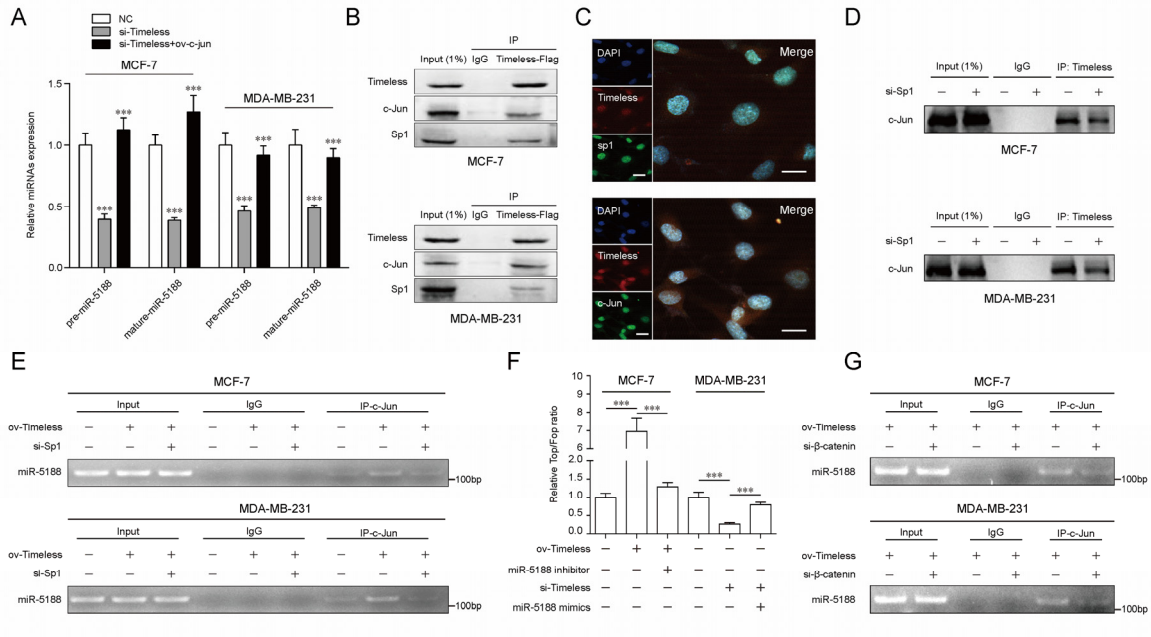

**Figure S5. Timeless facilitates miR-5188-mediated breast cancer stemness, metastasis, proliferation, chemoresistance, and Wnt/ $\beta$ -catenin/c-Jun signaling.** (A) qRT-PCR analysis of pre-miR-5188 and mature miR-5188 expression in Timeless-depleted MCF-7 and MDA-MB-231 cells, Timeless-depleted MCF-7 and MDA-MB-231 cells with c-Jun overexpression, and their control cells. (B) Exogenous and endogenous co-immunoprecipitation analysis of the interaction between Timeless and Sp1, and Timeless and c-Jun. (C) Immunofluorescence co-staining of Timeless and Sp1, and Timeless and c-Jun were performed to detect their colocalization. The fluorescence intensities along the dark arrow crossing the cytoplasm were calculated to show the colocalization of Timeless and Sp1, and Timeless and c-Jun. (D) Co-immunoprecipitation analysis of the effect of Sp1 on the interaction between Timeless and c-Jun. (E) Chromatin immunoprecipitation analysis of c-Jun binding to miR-5188 promoter in Timeless-overexpressed MCF-7 and MDA-MB-231 cells, Timeless-overexpressed MCF-7 and MDA-MB-231 cells with Sp1 knockdown, and their control cells. (F) TOP/FOP luciferase reporter assays of Wnt/ $\beta$ -catenin signaling activity in Timeless-overexpressed MCF-7, Timeless-overexpressed MCF-7 with miR-5188 knockdown, Timeless-silenced MDA-MB-231 cells,

Timeless-silenced MDA-MB-231 cells with miR-5188 overexpression, and their control cells. (G) Chromatin immunoprecipitation analysis of c-Jun binding to miR-5188 promoter in Timeless-overexpressed MCF-7 cells, Timeless-overexpressed MCF-7 cells with  $\beta$ -catenin knockdown, Timeless-silenced MDA-MB-231 cells, Timeless-silenced MDA-MB-231 cells with  $\beta$ -catenin overexpression, and their control cells. \*\*\* $p < 0.001$ .



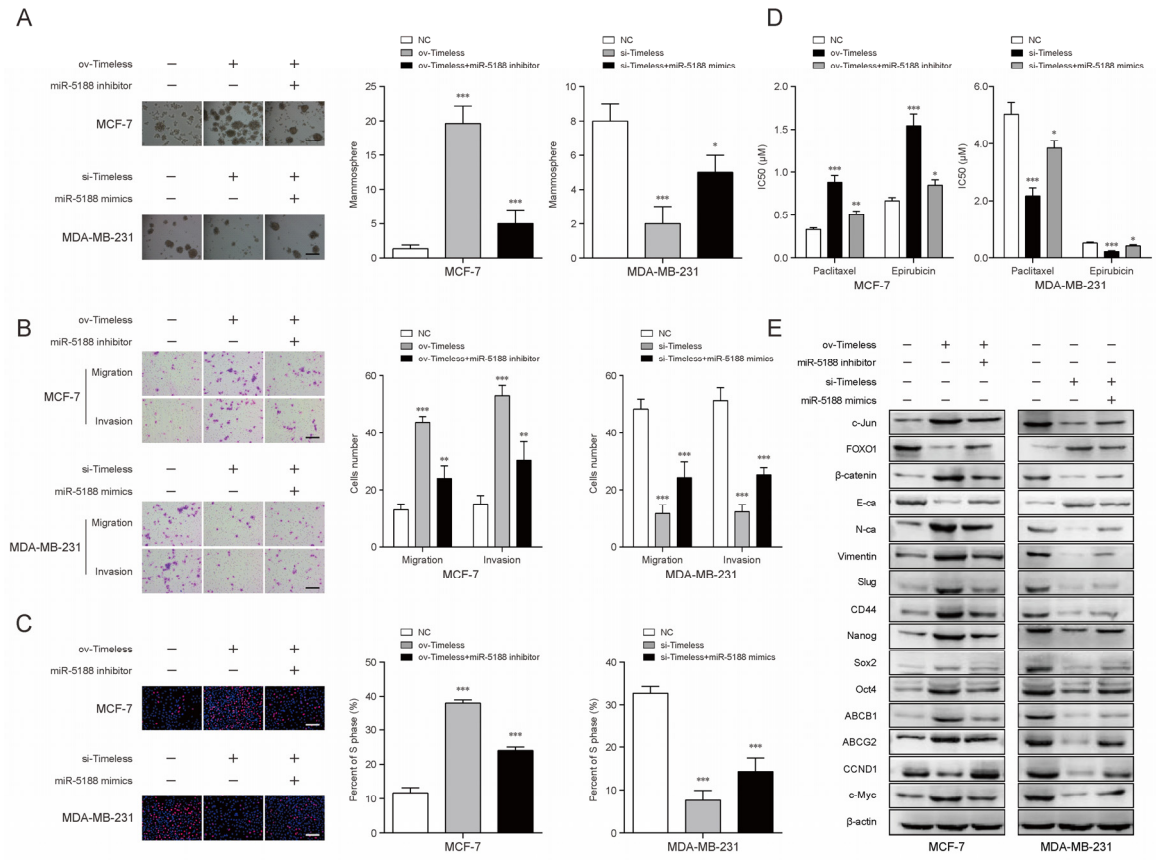

**Figure S6. Timeless accelerates miR-5188-mediated breast cancer stemness, metastasis, proliferation,**

**and chemoresistance.** (A) Mammosphere formation assays (Scale bar: 40  $\mu$ m), (B) transwell assays (Scale

bar: 40  $\mu$ m), (C) EdU incorporation assays (Scale bar: 100  $\mu$ m) and (D) drug sensitivity tests of Timeless-

overexpressed MCF-7 cells, Timeless-overexpressed MCF-7 cells with miR-5188 knockdown, Timeless-

silenced MDA-MB-231 cells, Timeless-silenced MDA-MB-231 cells with miR-5188 overexpression, and

their control cells. (E) Western blot analysis of stemness, metastasis, proliferation, chemoresistance, and

Wnt/ $\beta$ -catenin signaling-associated proteins expression in Timeless-overexpressed MCF-7 cells, Timeless-

overexpressed MCF-7 cells with miR-5188 knockdown, Timeless-silenced MDA-MB-231 cells, Timeless-

silenced MDA-MB-231 cells with miR-5188 overexpression, and their control cells. \*  $p < 0.05$ ; \*\*  $p < 0.01$ ;

\*\*\*  $p < 0.001$ .

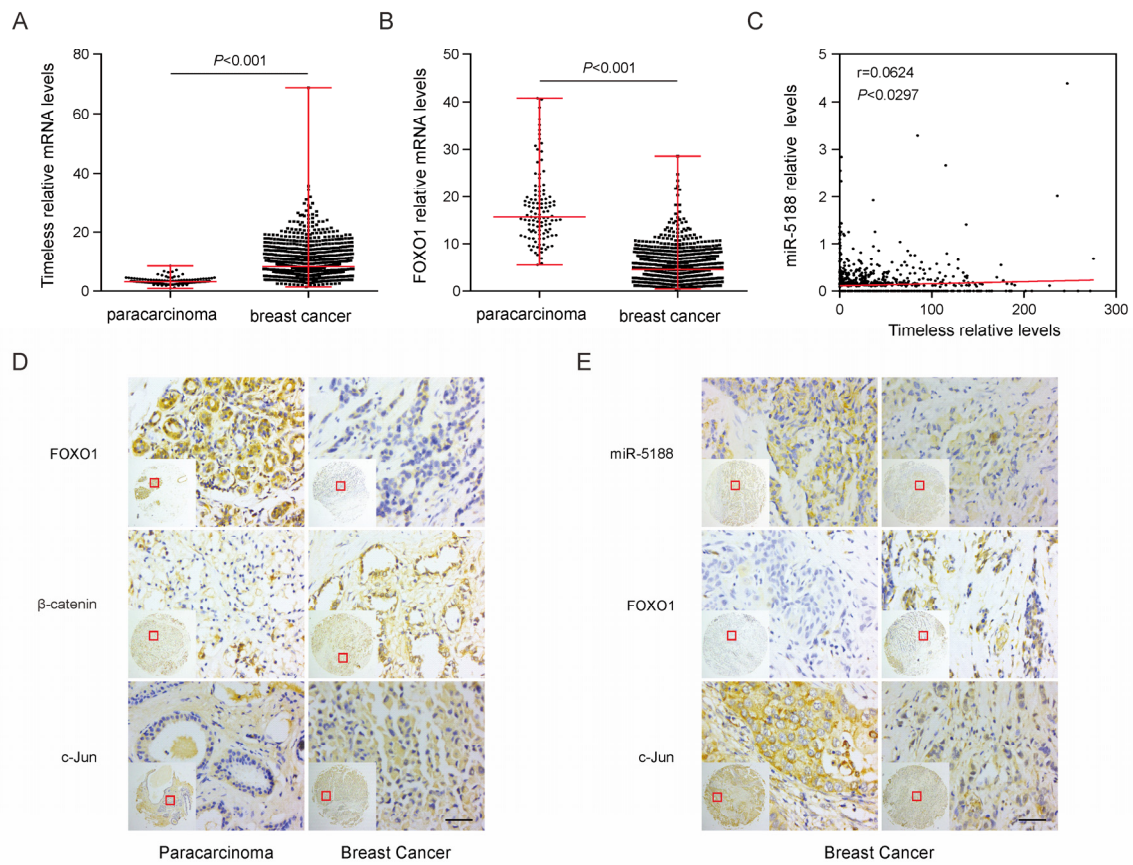

**Figure S7. The bioinformatics analysis, immunohistochemical and *in situ* hybridization analysis of miR-5188, FOXO1, c-Jun, and  $\beta$ -catenin expression were performed in breast cancer. (A-B) Comparison of Timeless and FOXO1 expression between breast cancer and para-carcinoma tissues. (C) The relationships between Timeless and miR-5188 expression (Spearman's rank correlation test). (D) Comparison of FOXO1, c-Jun, and  $\beta$ -catenin expression between breast cancer tissues and para-carcinoma tissues. (E) Correlations among FOXO1, c-Jun and miR-5188 expression in breast cancer tissues (Spearman's rank correlation test). The lines indicate median values, and the whiskers indicate minimum and maximum values (A-B), Wilcoxon rank sum test. Scale bar: 40  $\mu$ m.**

Supplemental Tables

**Table S1. Relationships between miR-5188, FOXO1,  $\beta$ -catenin, and c-Jun expression, and clinicopathological features of breast cancer patients**

| <b>1. miR-5188 expression in breast cancer and para-carcinoma</b> |                  |                            |             |                |       |
|-------------------------------------------------------------------|------------------|----------------------------|-------------|----------------|-------|
| <b>Group</b>                                                      | <b>Cases (n)</b> | <b>miR-5188 expression</b> |             | <b>P value</b> |       |
|                                                                   |                  | <b>Low</b>                 | <b>High</b> |                |       |
| <b>Breast cancer</b>                                              | 140              | 53 (37.9%)                 | 87 (62.1%)  |                |       |
| <b>Para-carcinoma</b>                                             | 77               | 46 (59.7%)                 | 31 (40.3%)  |                | 0.002 |

  

| <b>2. Correlation between miR-5188 and FOXO1 expression in breast cancer</b> |                         |             |              |              |                |
|------------------------------------------------------------------------------|-------------------------|-------------|--------------|--------------|----------------|
| <b>miR5188 expression</b>                                                    | <b>FOXO1 expression</b> |             | <b>Total</b> | <b>Kappa</b> | <b>P value</b> |
|                                                                              | <b>Low</b>              | <b>High</b> |              |              |                |
| <b>Low</b>                                                                   | 26 (49.1%)              | 27 (50.9%)  | 53           | -0.244       | 0.001          |
| <b>High</b>                                                                  | 67 (77.0%)              | 20 (23.0%)  | 87           |              |                |
| <b>Total</b>                                                                 | 93                      | 47          | 140          |              |                |

  

| <b>3. Correlation between c-Jun and miR-5188 expression in breast cancer</b> |                            |             |              |              |                |
|------------------------------------------------------------------------------|----------------------------|-------------|--------------|--------------|----------------|
| <b>c-Jun expression</b>                                                      | <b>miR-5188 expression</b> |             | <b>Total</b> | <b>Kappa</b> | <b>P value</b> |
|                                                                              | <b>Low</b>                 | <b>High</b> |              |              |                |
| <b>Low</b>                                                                   | 28 (48.3%)                 | 30 (51.7%)  | 58           | 0.180        | 0.033          |
| <b>High</b>                                                                  | 25 (30.5%)                 | 57 (69.5%)  | 82           |              |                |
| <b>Total</b>                                                                 | 53                         | 87          | 140          |              |                |

  

| <b>4. Correlation between FOXO1 and nuclear <math>\beta</math>-catenin expression in breast cancer</b> |                                                      |                 |              |              |                |
|--------------------------------------------------------------------------------------------------------|------------------------------------------------------|-----------------|--------------|--------------|----------------|
| <b>FOXO1 expression</b>                                                                                | <b>Nuclear <math>\beta</math>-catenin expression</b> |                 | <b>Total</b> | <b>Kappa</b> | <b>P value</b> |
|                                                                                                        | <b>Negative</b>                                      | <b>Positive</b> |              |              |                |
| <b>Low</b>                                                                                             | 76 (81.7%)                                           | 17 (18.3%)      | 93           | -0.139       | 0.057          |
| <b>High</b>                                                                                            | 44 (93.6%)                                           | 3 (6.4%)        | 47           |              |                |
| <b>Total</b>                                                                                           | 120                                                  | 20              | 140          |              |                |

  

| <b>5. Correlation between miR-5188 and <math>\beta</math>-catenin expression in breast cancer</b> |                                              |             |              |              |                |
|---------------------------------------------------------------------------------------------------|----------------------------------------------|-------------|--------------|--------------|----------------|
| <b>miR-5188 expression</b>                                                                        | <b><math>\beta</math>-catenin expression</b> |             | <b>Total</b> | <b>Kappa</b> | <b>P value</b> |
|                                                                                                   | <b>Low</b>                                   | <b>High</b> |              |              |                |
| <b>Low</b>                                                                                        | 35 (66.0%)                                   | 18 (34.0%)  | 53           | 0.152        | 0.055          |
| <b>High</b>                                                                                       | 43 (49.4%)                                   | 44 (50.6%)  | 87           |              |                |
| <b>Total</b>                                                                                      | 78                                           | 62          | 140          |              |                |

**Table S2. The sequences used in this study.**

|                            |           |                                                                                                                                     |                                |
|----------------------------|-----------|-------------------------------------------------------------------------------------------------------------------------------------|--------------------------------|
| c-Jun                      | 1         | Sense                                                                                                                               | 5' GGCACAGCUUAAACAGAAA dTdT 3' |
|                            |           | Antisense                                                                                                                           | 3' dTdT CCGUGUCGAAUUUGUCUUU 5' |
|                            | 2         | Sense                                                                                                                               | 5' CGCAGCAGUUGCAAACAUU dTdT 3' |
|                            |           | Antisense                                                                                                                           | 3' dTdT GCGUCGUCAACGUUUGUAA 5' |
| FOXO1                      | 1         | Sense                                                                                                                               | 5' CUGCAUCCAUGGACAACAA dTdT 3' |
|                            |           | Antisense                                                                                                                           | 3' dTdTGACGUAGGUACCUGUUGUU 5'  |
|                            | 2         | Sense                                                                                                                               | 5' CCAGAUGCCUAUACAAACA dTdT 3' |
|                            |           | Antisense                                                                                                                           | 3' dTdT GGUCUACGGAUUUGUUUGU 5' |
| β-catenin                  | 1         | Sense                                                                                                                               | 5' GAUGGUGUCUGCUAUUGUA dTdT 3' |
|                            |           | Antisense                                                                                                                           | 3' dTdT CUACCACAGACGAUAACAU 5' |
|                            | 2         | Sense                                                                                                                               | 5' GGACAAGGAAGCUGCAGAA dTdT 3' |
|                            |           | Antisense                                                                                                                           | 3' dTdT CCUGUCCUUCGACGUCUU 5'  |
| miR-5188 mimics            | Sense     | 5' AAUCGGACCCAUUUAAAACCGGAG 3'                                                                                                      |                                |
|                            | Antisense | 3' UUAGCCUGGGUAAAUUUGGCCUC 5'                                                                                                       |                                |
| Negative control           | Sense     | 5' UUUGUACUACACAAAAGUACUG 3'                                                                                                        |                                |
|                            | Antisense | 3' AAACAUGAUGUGUUUUCAUGAC 5'                                                                                                        |                                |
| miR-5188 inhibitor         |           | 5' CUCCGGUUUAAAUGGGUCCGAUU 3'                                                                                                       |                                |
| Inhibitor negative control |           | 5' CAGUACUUUUGUGUAGUACAAA 3'                                                                                                        |                                |
| miR-5188 precursor         |           | 5'GGGAGGCAUGGAAAUUUCUCUGGUUCAAUGGGUA<br>CGAUUAUUGUAAGCAGGAUCCAUAUCAAUAAUCGGACC<br>CAUUUAAAACCGGAGAUUUUAAAAGACAGGAAUAGAA<br>UCCCA 3' |                                |

**Table S3: The primers used in this study.**

| Primers name           |         | Sequence (5'-3')        |
|------------------------|---------|-------------------------|
| c-Jun                  | Forward | TCAGACAGTGCCCGAGATG     |
|                        | Reverse | CTGCTGCGTTAGCATGAGTT    |
| FOXO1                  | Forward | TGAACCGCCTGACCCAA       |
|                        | Reverse | CAATGAACATGCCATCCAAG    |
| $\beta$ -catenin       | Forward | GGCCAGAAATGCAGTTCGCCTT  |
|                        | Reverse | AATGGCACCCCTGCTCACGCA   |
| $\beta$ -actin         | Forward | CTCGCTGTCCACCTTCCA      |
|                        | Reverse | ACCTTCACCGTTCCAGTTTT    |
| miR-5188               |         | AATCGGACCCATTTAAACCGGAG |
| U6                     | Forward | CTCGCTTCGGCAGCACA       |
|                        | Reverse | AACGCTTCACGAATTTGCGT    |
| Pre-miR-5188           | Forward | TCTGGTTTCAATGGGTACG     |
|                        | Reverse | TCTCCGGTTTAAATGGGTC     |
| promoter of miR-5188-A | Forward | TGCGACGGAGAAAAGCC       |
|                        | Reverse | GGGACCCTGACGTGAAGTT     |
| promoter of miR-5188-B | Forward | GAGTCACCCAAGTCCCGTCCTA  |
|                        | Reverse | AGCGAGCGTCCTGATCCTTC    |
| promoter of miR-5188-C | Forward | TGCGAGATGGACGGGTCTT     |
|                        | Reverse | AGGCTCAGGGAGGTTGAAGG    |

**Table S4: A list of antibodies used for WB, RIP, ChIP, EMSA, Co-IP, ICC and IHC.**

| Antibodies name  | Cat. No    | Company     | Species | Dilution                                                         |
|------------------|------------|-------------|---------|------------------------------------------------------------------|
| Flag             | F7425      | Sigma       | Rabbit  | 1:1000 (WB); 1:20 (Co-IP)                                        |
| Ki67             | ab16667    | Abcam       | Rabbit  | 1:100 (IHC)                                                      |
| Ago2             | 03-110     | Millipore   | Mouse   | 1:20 (RIP)                                                       |
| c-Jun            | 9165       | CST         | Rabbit  | 1:1000 (WB); 1:50 (ChIP); 1:15 (EMSA); 1:20 (Co-IP); 1:300 (IHC) |
| $\beta$ -catenin | 8480       | CST         | Rabbit  | 1:1000 (WB); 1:100 (ICC); 1:100 (IHC)                            |
| $\beta$ -catenin | 2677       | CST         | Mouse   | 1:200 (ICC)                                                      |
| CD44             | 3570       | CST         | Mouse   | 1:1000 (WB)                                                      |
| ABCG2            | 42078      | CST         | Rabbit  | 1:1000 (WB)                                                      |
| FOXO1            | 2880       | CST         | Rabbit  | 1:1000 (WB); 1:20 (Co-IP); 1:100 (ICC); 1:100 (IHC)              |
| Slug             | 9585       | CST         | Rabbit  | 1:1000 (WB)                                                      |
| Ubiquitin        | 3933       | CST         | Rabbit  | 1:1000 (WB)                                                      |
| PCNA             | 13110      | CST         | Rabbit  | 1:1000 (IHC)                                                     |
| c-Myc            | 10828-1-AP | Proteintech | Rabbit  | 1:1000 (WB)                                                      |
| CCND1            | 60186-1-Ig | Proteintech | Mouse   | 1:1000 (WB)                                                      |
| SOX2             | 20118-1-AP | Proteintech | Rabbit  | 1:1000 (WB); 1:100 (IHC)                                         |
| OCT4             | 11263-1-AP | Proteintech | Rabbit  | 1:1000 (WB); 1:100 (IHC)                                         |
| Nanog            | 14295-1-AP | Proteintech | Rabbit  | 1:1000 (WB); 1:100 (IHC)                                         |
| ABCB1            | 22336-1-AP | Proteintech | Rabbit  | 1:1000 (WB)                                                      |
| E-cadherin       | 60335-1-Ig | Proteintech | Mouse   | 1:1000 (WB); 1:100 (IHC)                                         |
| N-cadherin       | 66219-1-Ig | Proteintech | Mouse   | 1:1000 (WB); 1:100 (IHC)                                         |
| Vimentin         | 10366-1-AP | Proteintech | Rabbit  | 1:1000 (WB); 1:1000 (IHC)                                        |
| CD133            | 18470-1-AP | Proteintech | Rabbit  | 1:1000 (WB)                                                      |
| $\beta$ -actin   | 6008-1-Ig  | Proteintech | Mouse   | 1:5000 (WB)                                                      |
| Histone          | 17168-1-AP | Proteintech | Rabbit  | 1:1000 (WB)                                                      |

---

**Table S5. The sequences used in Electrophoretic mobility shift assay.**

---

|          |             |                     |                                                                    |
|----------|-------------|---------------------|--------------------------------------------------------------------|
| miR-5188 | probes      | wild type           | 5'<br>ACGGGTGACGTCACGACAGCCCTAGAGTCACCCAAAT<br>TTTTGGGTCACATTT 3'  |
|          |             | wild type           | 5'<br>ACGGGTGACGTCACGACAGCCCTAGAGTCACCCAAAT<br>TTTTGGGTCACATTT 3'  |
|          |             | site 1<br>mutant    | 5'<br>ACGGGCTGTTCTTCGACAGCCCTAGAGTCACCCAAAT<br>TTTTGGGTCACATTT 3'  |
|          | competitors | site 2<br>mutant    | 5'<br>ACGGGTGACGTCACGACAGCCCTCATTCTTCCCAAATT<br>TTTGGGTCACATTT 3'  |
|          |             | site 3<br>mutant    | 5'ACGGGTGACGTCACGACAGCCCTAGAGTCACCCAAA<br>TTTTCAATG TTCATTT 3'     |
|          |             | all sites<br>mutant | 5'<br>ACGGGCTGTTCTTCGACAGCCCTCATTCTTCCCAAATT<br>TTCAATG TTCATTT 3' |

---
